# Supplementary material for: Perceived Neighborhood Environment and Its Association with Health Screening and Exercise Participation amongst Low-Income Public Rental Flat Residents in Singapore
Source: MDPI journal article supplement (doi:10.3390/ijerph16081384), 2019-04-17
Supplement: s1 [file s1]

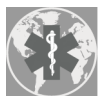

*Supplementary Material*

# Perceived Neighborhood Environment and Its Association with Health Screening and Exercise Participation amongst Low-Income Public Rental Flat Residents in Singapore

Liang En Wee, Yun Ying Tammy Tsang, Sook Muay Tay, Andre Cheah, Mark Puhaindran, Jaime Yee, Shannon Lee, Kellynn Oen and Choon Huat Gerald Koh

Table S1: Principal components analysis of the modified 17-item Neighbourhood Environment Walkability Scale-Abbreviated (NEWS-A).

| Original subscales of the NEWS                                            | Principal components derived from factor analysis    |                                                     |                                                     |
|---------------------------------------------------------------------------|------------------------------------------------------|-----------------------------------------------------|-----------------------------------------------------|
| <b>Crime safety (7 items)</b>                                             | Perceived safety and convenience (45.2% of variance) | Perceived physical environment (10.60% of variance) | Proximity to recreational areas (6.16% of variance) |
| Presence of litter/trash                                                  | 0.345                                                | <b>0.676</b>                                        | 0.153                                               |
| Lighting/signage in neighbourhood streets                                 | 0.303                                                | <b>0.616</b>                                        | -0.034                                              |
| Presence of pedestrians/people on the street                              | 0.341                                                | <b>0.637</b>                                        | 0.019                                               |
| Observed interaction (eg. conversation) between pedestrians on the street | <b>0.678</b>                                         | -0.099                                              | -0.022                                              |
| Perceived crime rate in neighbourhood                                     | <b>0.728</b>                                         | -0.112                                              | 0.158                                               |
| Perceived safety when walking around neighbourhood by day                 | <b>0.818</b>                                         | -0.134                                              | 0.097                                               |
| Perceived safety when walking around neighbourhood by night               | <b>0.730</b>                                         | -0.108                                              | 0.096                                               |
| <b>Land use access (2 items)</b>                                          |                                                      |                                                     |                                                     |
| Physical barriers in neighbourhood (eg. uneven ground, steps)             | 0.298                                                | <b>0.663</b>                                        | -0.053                                              |
| Easy to walk to bus & train stations                                      | <b>0.795</b>                                         | -0.043                                              | 0.004                                               |
| <b>Land use diversity (8 items)</b>                                       |                                                      |                                                     |                                                     |
| Grocery store (provision shop, wet market, supermarket)                   | <b>0.857</b>                                         | -0.131                                              | 0.061                                               |

|                                                                        |              |        |              |
|------------------------------------------------------------------------|--------------|--------|--------------|
| Eating place (hawker centre, coffee shop)                              | <b>0.729</b> | -0.063 | -0.178       |
| Financial services (bank/ATM/post office)                              | <b>0.761</b> | 0.031  | -0.069       |
| Religious institution (eg. temples, churches)                          | <b>0.706</b> | -0.071 | -0.029       |
| Dispensaries (pharmacies, medicinal shops)                             | <b>0.845</b> | -0.128 | 0.065        |
| Medical services (clinics/dentals)                                     | <b>0.863</b> | -0.111 | 0.038        |
| Community activity centre (eg. community club, senior activity centre) | <b>0.787</b> | -0.097 | -0.188       |
| Recreational areas (eg. park, swimming pools, gym or fitness facility) | -0.080       | -0.030 | <b>0.946</b> |

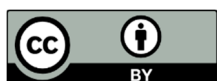

© 2019 by the authors. Submitted for possible open access publication under the terms and conditions of the Creative Commons Attribution (CC BY) license (<http://creativecommons.org/licenses/by/4.0/>).
